# Supplementary material for: Plant root nodule like nickel-oxide–multi-walled carbon nanotube composites for non-enzymatic glucose sensors
Source: Royal Society of Chemistry journal article supplement (doi:10.1039/c5ra03720d), 2015-01-01
Supplement: c5ra03720d1.pdf [file c5ra03720d1.pdf]

## Supplementary information

The prepared catalyst precursors were characterised by powder X-ray diffraction method. Figure SI 1 shows the XRD pattern of prepared nickel formate. They have the characteristic peaks a,b, c and d (JCPDS 14-0813)

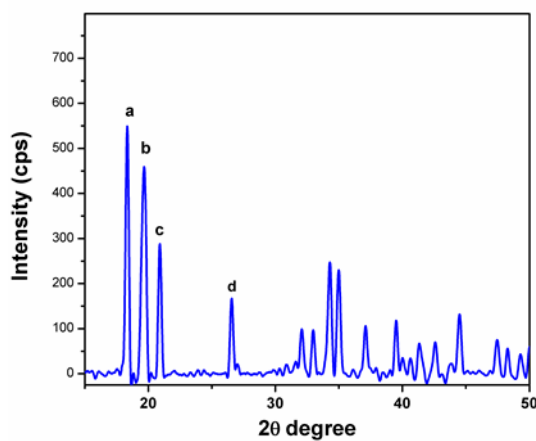

**Fig. SI.1** XRD pattern of nickel formate. Peak a, b, c and d are the characteristic peaks of nickel formate (JCPDS 14-0813).

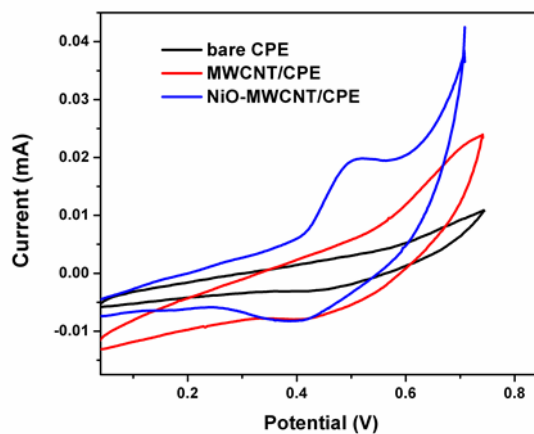

**Fig. SI.2** CV of bare CPE, MWCNT/CPE and NiO/CPE electrodes at the scan rate of 50  $\text{mVs}^{-1}$  in 1 mM NaOH.

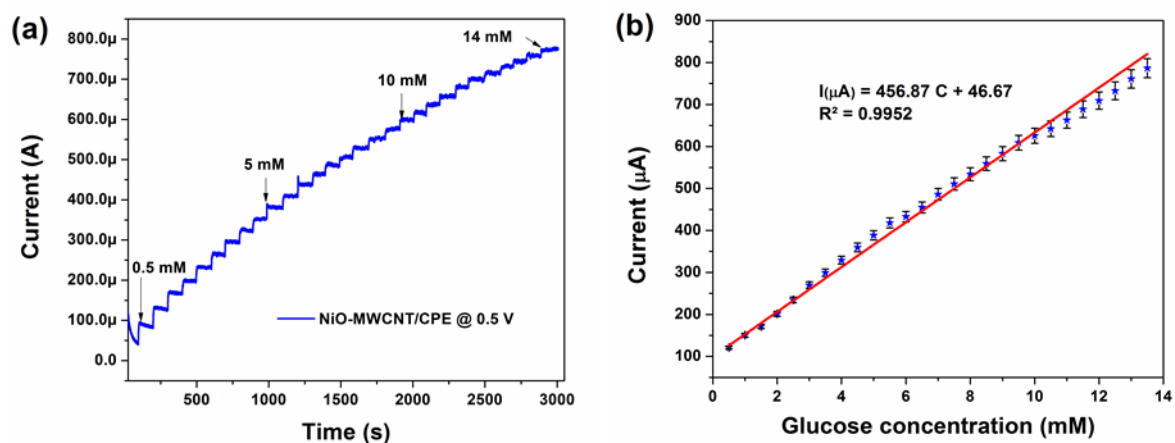

**Fig. S1.3** (a) amperometric responses of NiO-MWCNT/CPE electrode upon the successive addition of 0.5 mM glucose (b) the amperometric current plotted vs. total glucose concentration, and their corresponding linear calibration curves (0.5 mM -14 mM).
